# Supplementary material
Source: Royal Society of Chemistry journal article supplement (doi:10.1039/d6ma00162a)
Supplement: d6ma00162a1.pdf [file d6ma00162a1.pdf]

### Supplementary files

# Laser-Induced Graphene electrode and Eco-friendly Chitosan-Poly(ethylene)glycol-LiClO<sub>4</sub> Electrolytes for All-Solid state Flexible Supercapacitors

Jadan Resnik Jaleel UC<sup>1</sup>, Somashekara Bhat<sup>1\*</sup>, Sudhakar Y N<sup>1</sup>, Vipin Cyriac<sup>2</sup>

<sup>1</sup> Manipal Institute of Technology, Manipal Academy of Higher Education, Manipal, India

<sup>2</sup>Centre for Interdisciplinary Research, SRM University-AP, Amaravati, India

\*Corresponding author: E-mail address: [soma.bhat@manipal.edu](mailto:soma.bhat@manipal.edu) (Somashekara Bhat)

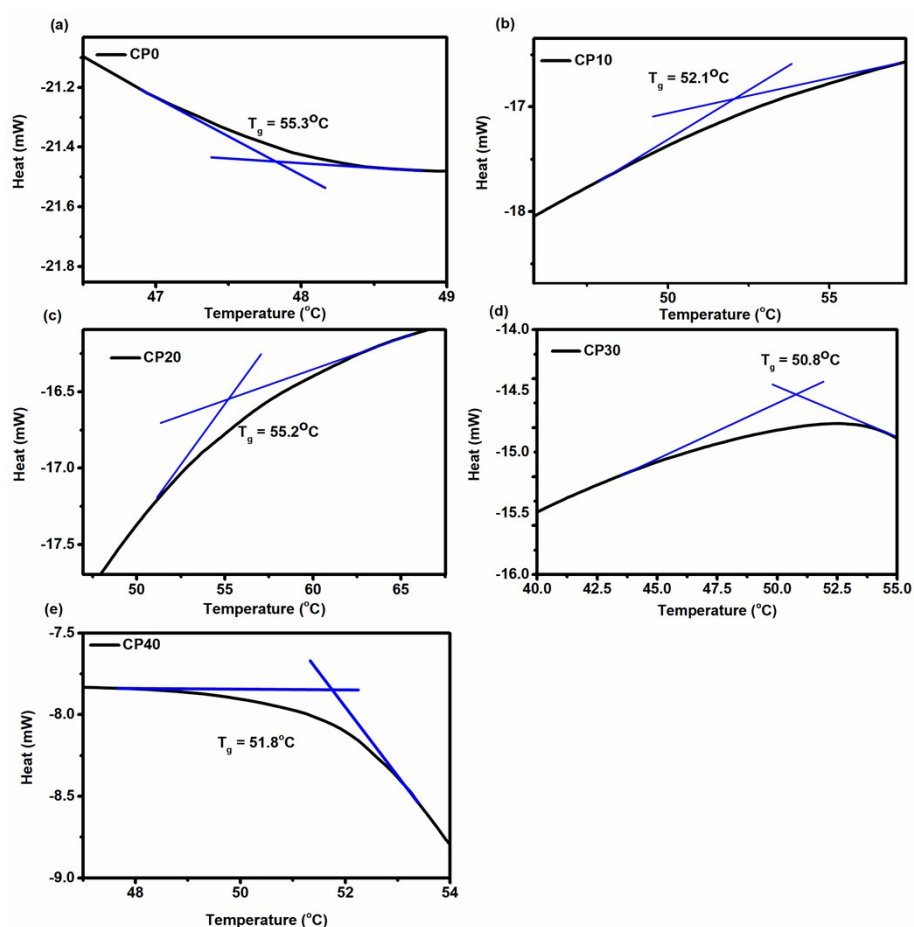

Figure S1. Determination of glass transition temperature (T<sub>g</sub>) by the tangent method for the CP series: (a) CP0, (b) CP10, (c) CP20, (d) CP30, and (e) CP40.

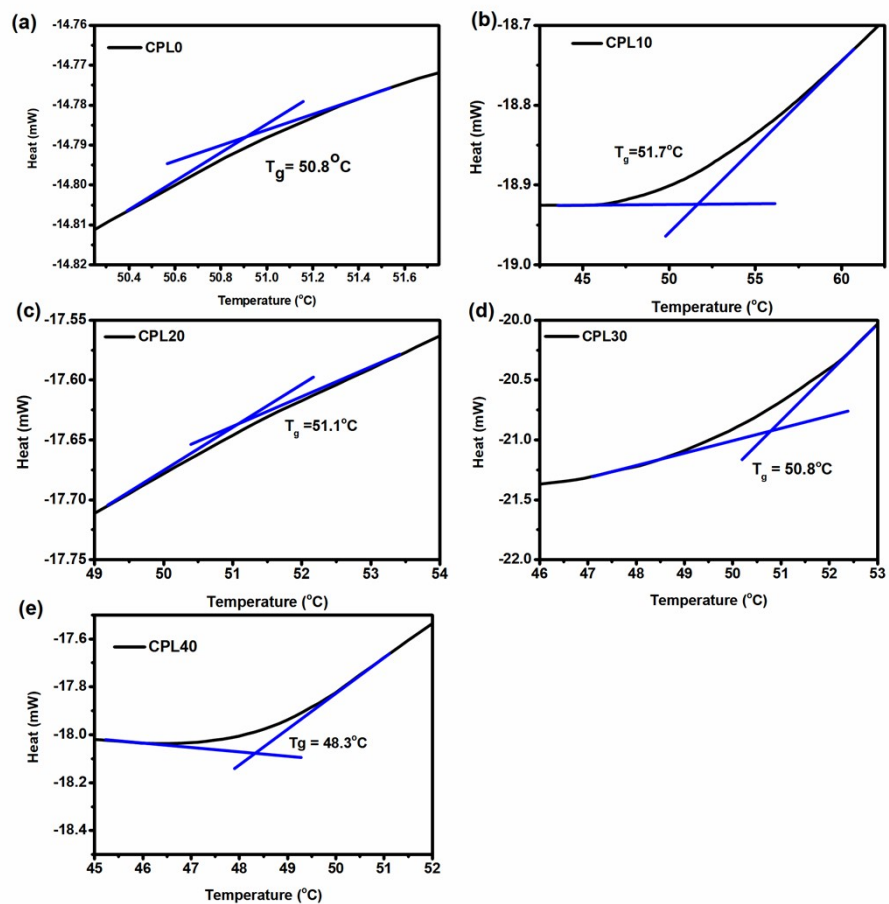

Figure S2. Determination of glass transition temperature ( $T_g$ ) by the tangent method for the CPL series: (a) CPL0, (b) CPL10, (c) CPL20, (d) CPL30, (e) CPL40, and (f) CPL50

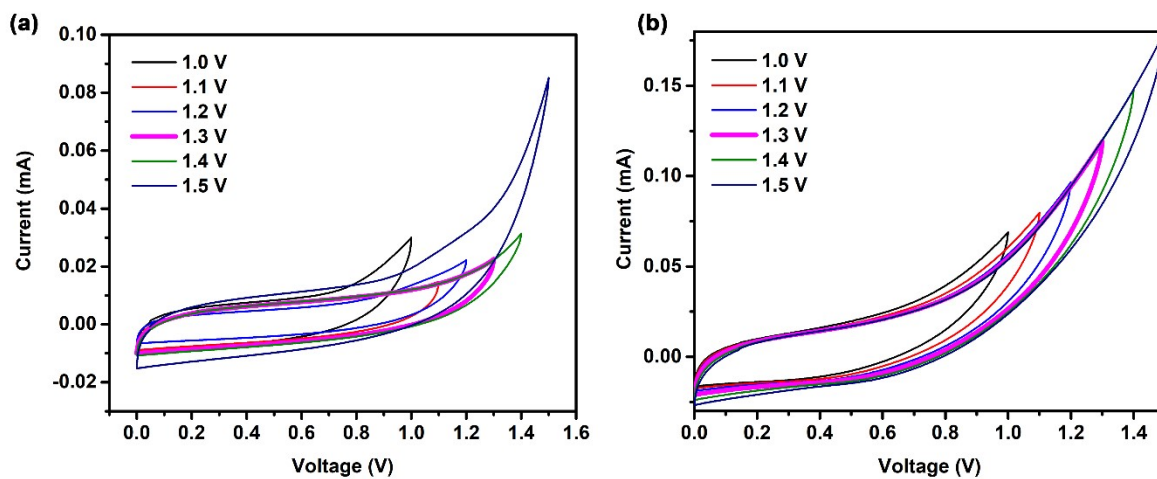

Figure S3. CV curves of (a) SC-1 and (b) SC-2 recorded at different potential windows from 1.0 V to 1.5 V at scan rate of  $5 \text{ mVs}^{-1}$

Table S1.  $T_g$  of Chitosan- PEG blends

| Name of Blend | $T_g$ (°C) |
|---------------|------------|
| CP0           | 55.3       |
| CP10          | 52.1       |
| CP20          | 55.2       |
| CP30          | 50.8       |
| CP40          | 51.8       |

  

|       |      |
|-------|------|
| CPL0  | 50.8 |
| CPL10 | 51.7 |
| CPL20 | 51.1 |
| CPL30 | 50.8 |
| CPL40 | 48.3 |

Table S2. Electrochemical Impedance Spectroscopy (EIS) Fitting Parameters for CPL10 and CPL20 Electrolytes

| Sample | Q1                      | a1     | Q2                      | a2     | R2(k $\Omega$ ) | Normalized $\chi^2$ |
|--------|-------------------------|--------|-------------------------|--------|-----------------|---------------------|
| CPL10  | $0.3489 \times 10^{-6}$ | 0.5508 | $0.7009 \times 10^{-9}$ | 0.8631 | 16.651          | 0.3636              |
| CPL20  | $0.5205 \times 10^{-6}$ | 0.6706 | $1.68 \times 10^{-9}$   | 0.8225 | 2.226           | 0.09611             |

- Q1,Q2 – Constant Phase Element (CPE) parameters
- a1,a2 – CPE exponent (0–1) indicating deviation from ideal capacitance
- R2 – Bulk resistance of electrolyte ( $\Omega$ )
- $\chi^2$ – Goodness-of-fit parameter from impedance fitting

Table S3. Electrochemical Impedance Spectroscopy (EIS) Fitting Parameters for CPL30, CPL40 and CPL50 Electrolytes

| Sample | R1(k $\Omega$ ) | Q1                    | A1     | Normalized $\chi^2$ |
|--------|-----------------|-----------------------|--------|---------------------|
| CPL30  | 0.108           | $8.63 \times 10^{-6}$ | 0.6367 | 0.04994             |
| CPL40  | 0.062           | $6.81 \times 10^{-6}$ | 0.5903 | 0.087               |
| CPL50  | 0.167           | $1.90 \times 10^{-6}$ | 0.6313 | 0.06611             |

- R1 – Bulk resistance of electrolyte ( $\Omega$ )

- Q1 – Constant Phase Element parameter
- a1 – CPE exponent

$\chi^2$  – Fitting error value
